# Supplementary material for: Aluminum-26 chronology of dust coagulation and early solar system evolution
Source: PubMed Central journal article supplement — Sci Adv. 2019 Sep 11;5(9):eaaw3350. doi: 10.1126/sciadv.aaw3350 (PMC6739091; doi:10.1126/sciadv.aaw3350), 2019-09-11
Supplement: aaw3350_SM.pdf [file aaw3350_SM.pdf]

## Supplementary Materials for

### Aluminum-26 chronology of dust coagulation and early solar system evolution

M.-C. Liu\*, J. Han, A. J. Brearley, A. T. Hertwig

\*Corresponding author. Email: mcliu@ucla.edu

Published 11 September 2019, *Sci. Adv.* **5**, eaaw3350 (2019)

DOI: 10.1126/sciadv.aaw3350

#### This PDF file includes:

Supplementary Materials and Methods

Fig. S1. Individual internal  $^{26}\text{Al}$  isochrons obtained in 18  $^{26}\text{Al}$ -bearing inclusions.

Fig. S2. Example of IMF characterized in one analysis session.

Table S1. Magnesium isotopic compositions of 22 inclusions analyzed in this study.

Table S2. Relative sensitivity factors determined on standards with known  $^{27}\text{Al}/^{24}\text{Mg}$  in three analysis sessions.

## Supplementary Materials and Methods

### Sample description

#### Hibonite crystals: 019, 176, and 181

019: This inclusion consists only of hibonite crystals. They are closely distributed in the matrix and may be fragments of a larger inclusion.

176: This inclusion is a hibonite crystal with minor perovskite.

181: This CAI is an elongated hibonite crystal containing subrounded to elongated perovskite grains.

#### Corundum-bearing, hibonite-rich inclusions: 030 and 086.

030: This inclusion is dominated by hibonite laths surrounded by spinel. Minor corundum occurs in hibonite. Perovskite occurs in hibonite and, with much finer size, in spinel.

086: This inclusion consists of hibonite and corundum. Al-Ti-rich unknown oxide (possibly perovskite due to mixed x-ray signal with corundum?) was identified.

#### Hibonite-bearing, spinel-rich inclusions: 021, 073, 117, 119, 147, 148, 164, 222, and 230

021: This inclusion consists predominantly of spinel, accompanied by hibonite laths and fine-grained perovskite grains.

073: This inclusion has randomly oriented hibonite laths embedded in spinel, with minor perovskite.

074: This CAI appears to have a concentric structure consisting of a hibonite-rich core surrounded by spinel. The hibonite-rich core is the aggregates of randomly oriented hibonite laths with subrounded perovskite grains that are partially surrounded by spinel.

095: In this CAI, hibonite is attached to spinel.

117: Hibonite laths are partially embedded in spinel, finally partially rimmed by diopside. Minor perovskite is present in hibonite and spinel.

119: This inclusion appears to have three nodules consisting of hibonite laths embedded in spinel, finally rimmed by diopside. A perovskite grain occurs only in spinel.

147: This inclusion is a single nodule consisting of hibonite embedded in spinel, finally completely rimmed by diopside.

148: Hibonite laths are partially to completely embedded in spinel, finally rimmed by diopside.

155: Two different orientations of hibonite laths are attached to spinel.

164: This CAI consists of randomly-oriented hibonite laths embedded in spinel, finally partially rimmed by diopside.

222: This inclusion contains hibonite and spinel, partially surrounded by diopside.

230: This CAI has randomly-oriented hibonite laths embedded in spinel.

230SW: This CAI has randomly-oriented hibonite laths embedded in spinel.

#### Hibonite-free, spinel-rich inclusions: 070, 165, 212, and 229

070: This CAI consists of elongated spinel cores surrounded by intergrowth layers of spinel and Al-Ti-rich pyroxene, finally rimmed by diopside. Thin layers of forsteritic olivine often occur on the exterior of diopside rim. Minor perovskite is present in spinel.

165: In this CAI, spinel is partially surrounded by intergrowth layers of spinel and Al-Ti-rich pyroxene, followed by diopside, olivine, and finally diopside.

212: This inclusion is a single nodule consisting of a spinel core surrounded by an intergrowth layer of spinel and Al-Ti-rich pyroxene, finally completely rimmed by diopside. Minor forsteritic olivine occurs on the exterior of diopside rim. Minor perovskite is present in spinel.

229: This inclusion consists of spinel cores separated by intergrowth layers of spinel and Al-Ti-rich pyroxene, finally rimmed by diopside. Thin layers of forsteritic olivine with minor Fe, Ni-metal often occur on the exterior of diopside rim. Perovskite and rare melilite occur in spinel.

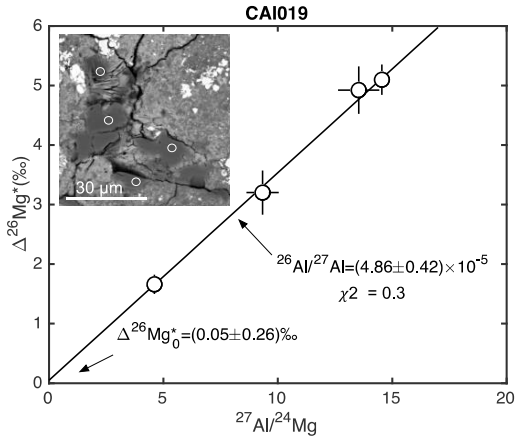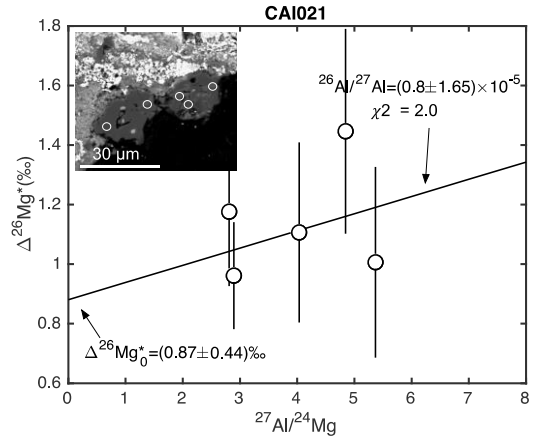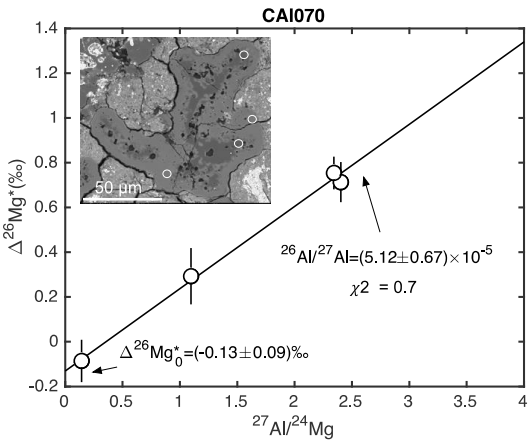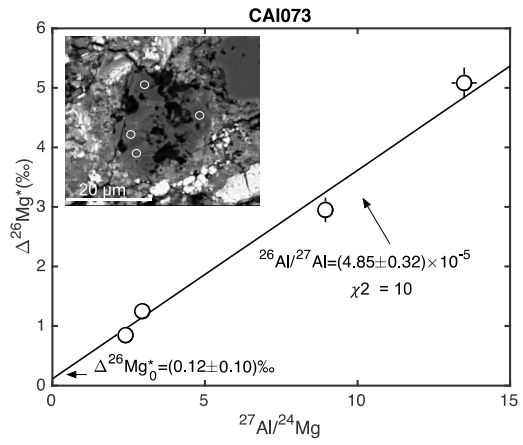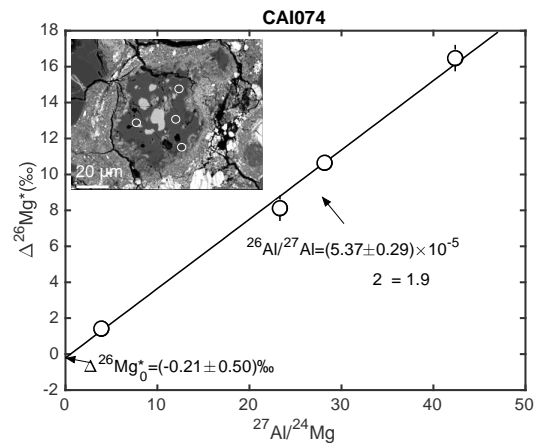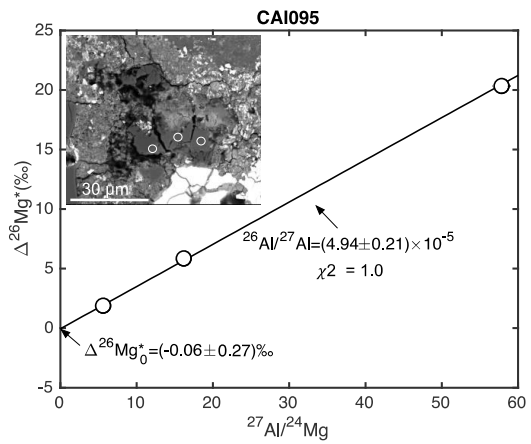

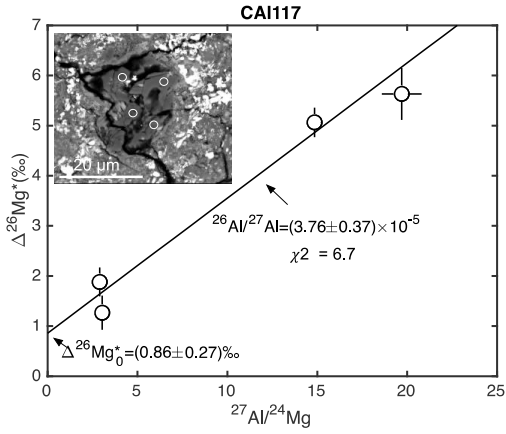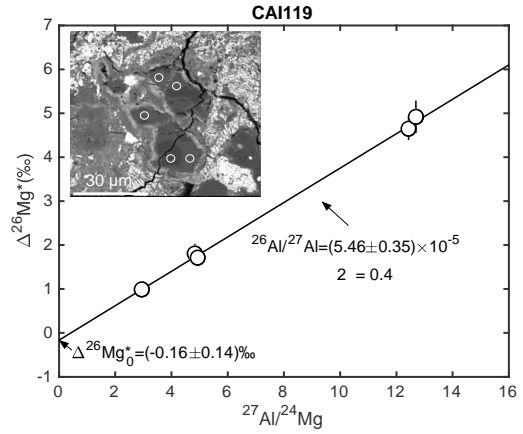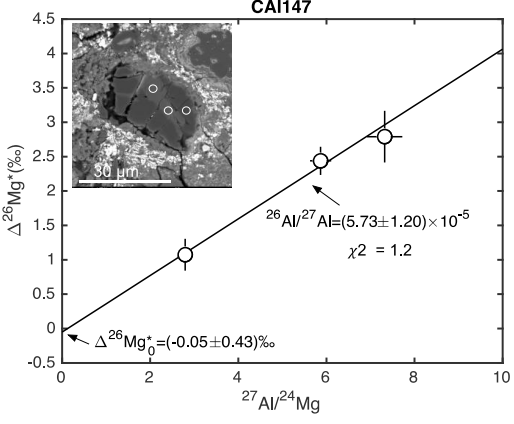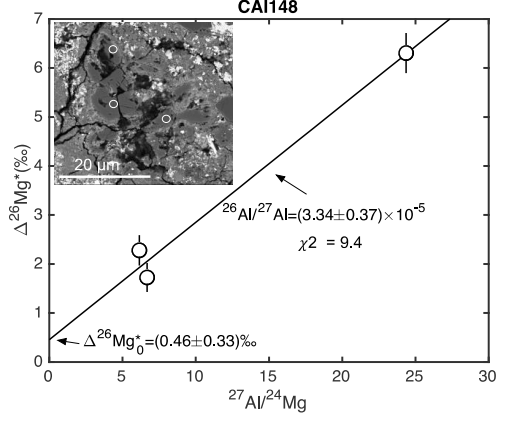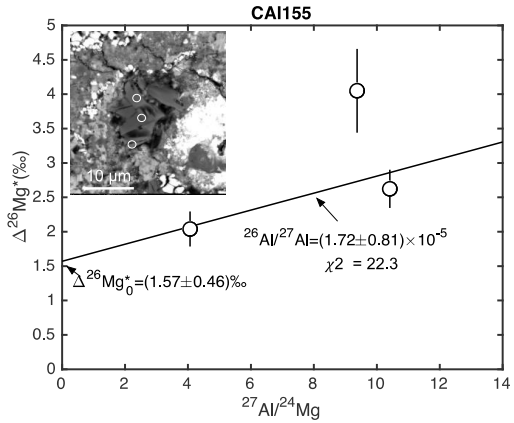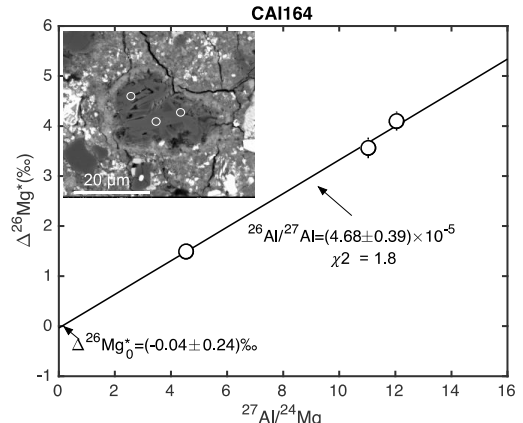

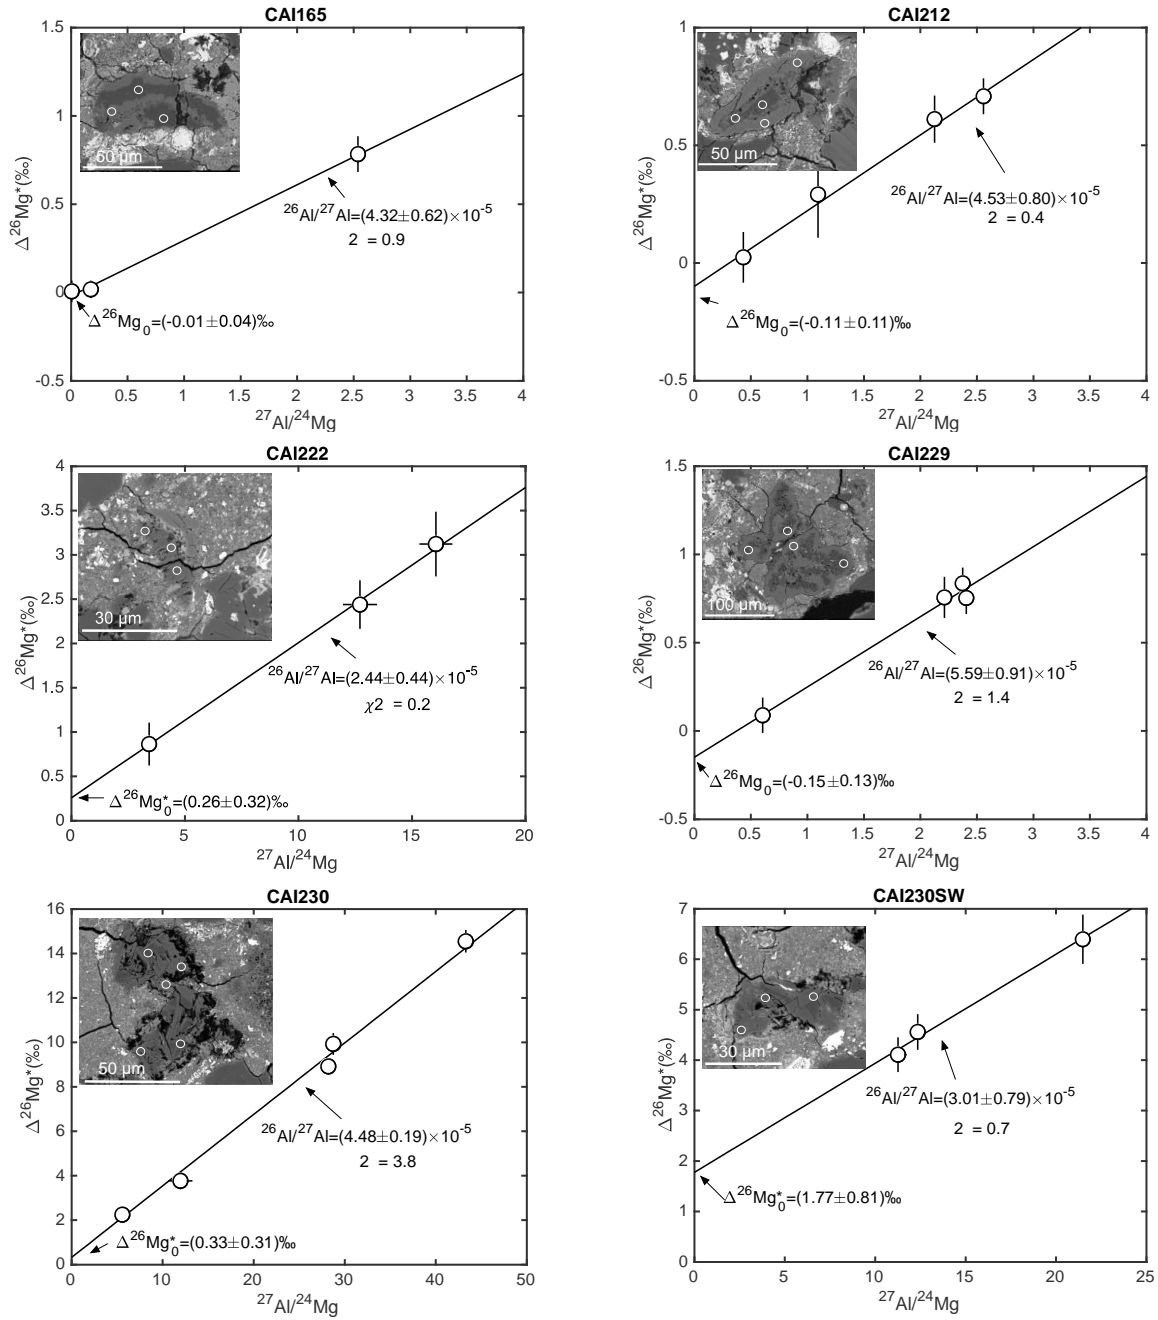

**Fig. S1. Individual internal  $^{26}\text{Al}$  isochrons obtained in 18  $^{26}\text{Al}$ -bearing inclusions. Errors are  $2\sigma$ .**

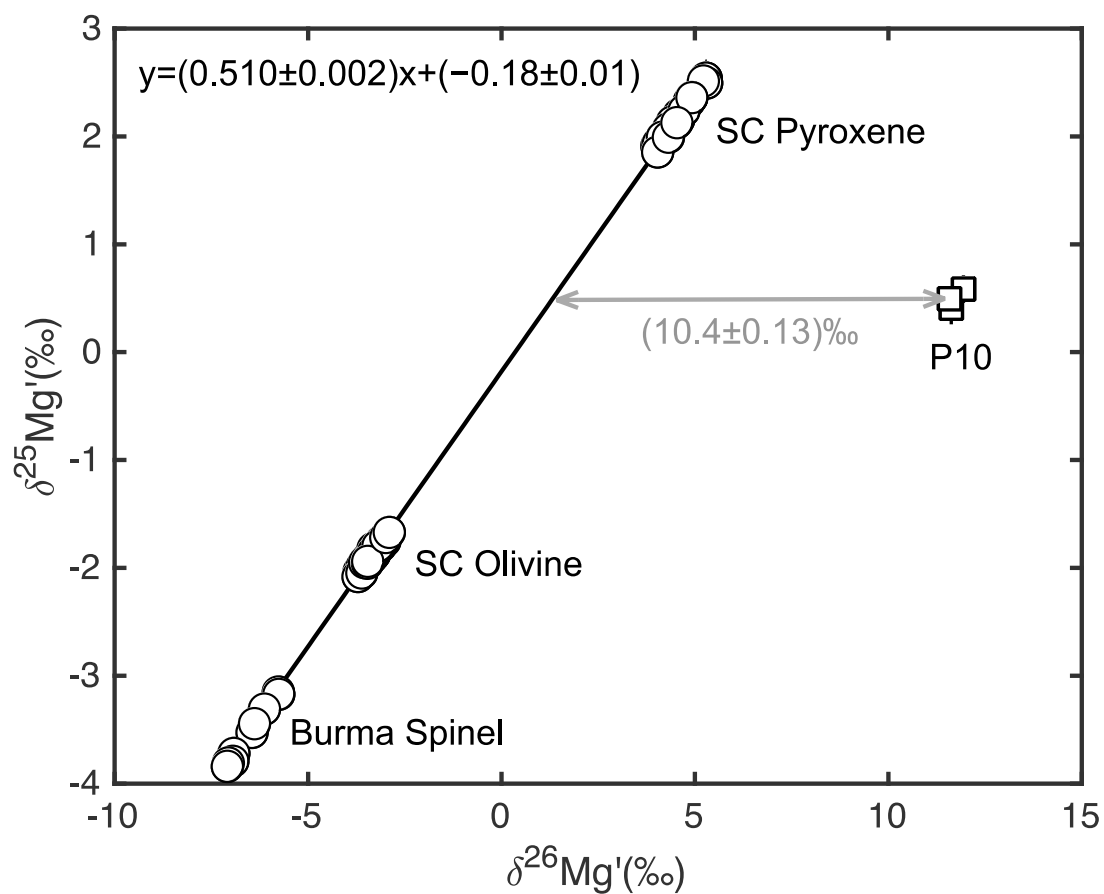

**Fig. S2. Example of IMF characterized in one analysis session.** Measurements on three magnesium-rich standards yielded a slope of  $0.510 (\pm 0.002)$  in  $\delta^{25}\text{Mg}' - \delta^{26}\text{Mg}'$  space (see above for the definition of  $\delta^i\text{Mg}'$ ). An in-house P10 glass ( $\Delta^{26}\text{Mg}^* = 10.3\text{‰}$ ) was used as a secondary standard to check the measurement accuracy.

**Table S1. Magnesium isotopic compositions of 22 inclusions analyzed in this study.**  $\delta^{25}\text{Mg}$  values have been corrected for instrumental mass fractionation by using the corresponding standards. h: hibonite; s: spinel; d: Al-Ti-rich diopside; f: forsterite.

| Sample/spot          | Ip (nA) | $^{24}\text{Mg}$ (cps) | $\delta^{25}\text{Mg}$ (‰, $\pm 2\sigma$ ) | $^{27}\text{Al}/^{24}\text{Mg}$ ( $\pm 2\sigma$ ) | $\Delta^{26}\text{Mg}^*$ (‰, $\pm 2\sigma$ ) |
|----------------------|---------|------------------------|--------------------------------------------|---------------------------------------------------|----------------------------------------------|
| CAI 019              |         |                        |                                            |                                                   |                                              |
| h1                   | 8       | $3.24 \times 10^7$     | $-1.92 \pm 0.36$                           | $14.55 \pm 0.27$                                  | $5.10 \pm 0.26$                              |
| h2                   | 8       | $4.90 \times 10^7$     | $-2.20 \pm 0.37$                           | $13.53 \pm 0.90$                                  | $4.92 \pm 0.40$                              |
| h3                   | 8       | $3.92 \times 10^7$     | $-1.94 \pm 0.37$                           | $9.33 \pm 0.71$                                   | $3.20 \pm 0.37$                              |
| h4                   | 8       | $1.17 \times 10^8$     | $-2.35 \pm 0.34$                           | $4.61 \pm 0.09$                                   | $1.66 \pm 0.16$                              |
| CAI 021              |         |                        |                                            |                                                   |                                              |
| h1                   |         | $1.83 \times 10^7$     | $-3.03 \pm 0.37$                           | $4.85 \pm 0.03$                                   | $1.45 \pm 0.34$                              |
| h2                   | 1       | $2.56 \times 10^7$     | $-3.75 \pm 0.35$                           | $4.03 \pm 0.03$                                   | $1.11 \pm 0.30$                              |
| s1                   | 1       | $2.96 \times 10^7$     | $-4.54 \pm 0.36$                           | $2.81 \pm 0.02$                                   | $1.18 \pm 0.25$                              |
| h3                   | 1       | $1.91 \times 10^7$     | $-2.89 \pm 0.38$                           | $5.37 \pm 0.06$                                   | $1.01 \pm 0.32$                              |
| s2                   | 1       | $3.13 \times 10^7$     | $-2.57 \pm 0.45$                           | $2.89 \pm 0.02$                                   | $0.96 \pm 0.18$                              |
| CAI 030              |         |                        |                                            |                                                   |                                              |
| h1                   | 5       | $2.00 \times 10^7$     | $-8.02 \pm 0.39$                           | $36.55 \pm 0.35$                                  | $-0.23 \pm 0.35$                             |
| h2                   | 5       | $2.74 \times 10^7$     | $-4.44 \pm 0.37$                           | $20.51 \pm 0.60$                                  | $-0.12 \pm 0.31$                             |
| h3                   | 5       | $1.20 \times 10^7$     | $-2.20 \pm 0.43$                           | $43.45 \pm 0.58$                                  | $0.29 \pm 0.45$                              |
| CAI 070              |         |                        |                                            |                                                   |                                              |
| s1                   | 8       | $2.21 \times 10^8$     | $0.64 \pm 0.21$                            | $2.40 \pm 0.02$                                   | $0.71 \pm 0.09$                              |
| s2                   | 8       | $2.28 \times 10^8$     | $0.67 \pm 0.20$                            | $2.34 \pm 0.02$                                   | $0.75 \pm 0.07$                              |
| d1                   | 8       | $1.38 \times 10^8$     | $-0.52 \pm 0.28$                           | $1.10 \pm 0.05$                                   | $0.29 \pm 0.13$                              |
| d2                   | 8       | $1.64 \times 10^8$     | $-0.30 \pm 0.27$                           | $0.14 \pm 0.01$                                   | $-0.09 \pm 0.09$                             |
| CAI 073              |         |                        |                                            |                                                   |                                              |
| h1                   | 5       | $5.08 \times 10^7$     | $-0.08 \pm 0.36$                           | $13.49 \pm 0.41$                                  | $5.08 \pm 0.26$                              |
| h2                   | 5       | $7.44 \times 10^7$     | $-4.16 \pm 0.36$                           | $8.95 \pm 0.23$                                   | $2.95 \pm 0.21$                              |
| s1                   | 5       | $1.13 \times 10^8$     | $-1.64 \pm 0.34$                           | $2.95 \pm 0.03$                                   | $1.25 \pm 0.08$                              |
| s2                   | 5       | $1.42 \times 10^8$     | $2.89 \pm 0.34$                            | $2.40 \pm 0.03$                                   | $0.85 \pm 0.10$                              |
| CAI 074              |         |                        |                                            |                                                   |                                              |
| h1                   | 3       | $1.12 \times 10^7$     | $-2.73 \pm 0.58$                           | $28.16 \pm 0.44$                                  | $10.64 \pm 0.42$                             |
| h2                   | 5       | $7.63 \times 10^6$     | $-2.22 \pm 0.49$                           | $42.36 \pm 0.61$                                  | $16.47 \pm 0.74$                             |
| h3                   | 3       | $1.01 \times 10^7$     | $-2.66 \pm 0.51$                           | $23.31 \pm 0.85$                                  | $8.12 \pm 0.71$                              |
| h4                   |         |                        |                                            |                                                   |                                              |
| (overlapping spinel) | 1       | $1.56 \times 10^7$     | $-3.98 \pm 0.51$                           | $3.90 \pm 0.15$                                   | $1.42 \pm 0.46$                              |
| CAI 086              |         |                        |                                            |                                                   |                                              |
| h1                   | 5       | $9.81 \times 10^6$     | $-1.67 \pm 0.50$                           | $32.12 \pm 1.34$                                  | $-0.40 \pm 0.49$                             |



|                           |    |   |                    |                  |                                  |                  |
|---------------------------|----|---|--------------------|------------------|----------------------------------|------------------|
| CAI 095                   | h2 | 3 | $9.03 \times 10^6$ | $-1.12 \pm 0.48$ | $20.02 \pm 0.33$                 | $-0.85 \pm 0.43$ |
|                           | h1 | 5 | $3.10 \times 10^7$ | $-2.42 \pm 0.36$ | $16.17 \pm 0.61$                 | $5.86 \pm 0.35$  |
|                           | h2 | 5 | $1.17 \times 10^7$ | $-2.76 \pm 0.42$ | $57.84 \pm 1.18$                 | $20.34 \pm 0.64$ |
|                           | h3 | 5 | $8.40 \times 10^7$ | $-2.57 \pm 0.36$ | $5.60 \pm 0.40$                  | $1.88 \pm 0.20$  |
| CAI 117                   | h1 | 3 | $2.00 \times 10^7$ | $-1.51 \pm 0.47$ | $14.85 \pm 0.37$                 | $5.07 \pm 0.29$  |
|                           | h2 | 3 | $1.29 \times 10^7$ | $-0.56 \pm 0.49$ | $19.70 \pm 1.11$                 | $5.63 \pm 0.52$  |
|                           | s1 | 1 | $1.78 \times 10^7$ | $-1.29 \pm 0.46$ | $2.90 \pm 0.04$                  | $1.88 \pm 0.29$  |
|                           | s2 |   |                    |                  |                                  |                  |
| (overlapping<br>hibonite) |    | 1 | $1.42 \times 10^7$ | $0.34 \pm 0.49$  | $3.04 \pm 0.05$                  | $1.27 \pm 0.34$  |
| CAI 119                   | h1 | 8 | $6.31 \times 10^7$ | $-3.76 \pm 0.34$ | $12.43 \pm 0.22$                 | $4.65 \pm 0.26$  |
|                           | s1 | 8 | $2.09 \times 10^8$ | $-4.29 \pm 0.33$ | $2.94 \pm 0.06$                  | $0.99 \pm 0.10$  |
|                           | h2 | 8 | $6.55 \times 10^7$ | $-6.14 \pm 0.34$ | $4.83 \pm 0.24$                  | $1.81 \pm 0.22$  |
|                           | h3 | 8 | $1.28 \times 10^8$ | $-5.18 \pm 0.33$ | $4.93 \pm 0.20$                  | $1.71 \pm 0.17$  |
|                           | h4 | 8 | $3.17 \times 10^7$ | $-5.81 \pm 0.35$ | $12.69 \pm 0.17$                 | $4.92 \pm 0.37$  |
| CAI 147                   | h1 | 3 | $2.92 \times 10^7$ | $-1.23 \pm 0.46$ | $7.32 \pm 0.40$                  | $2.79 \pm 0.38$  |
|                           | s1 | 1 | $2.73 \times 10^7$ | $-3.58 \pm 0.46$ | $2.79 \pm 0.04$                  | $1.07 \pm 0.23$  |
|                           | h2 | 3 | $3.36 \times 10^7$ | $-1.35 \pm 0.47$ | $5.87 \pm 0.24$                  | $2.44 \pm 0.21$  |
| CAI 148                   | h1 | 5 | $1.54 \times 10^7$ | $-0.06 \pm 0.48$ | $24.36 \pm 0.47$                 | $6.30 \pm 0.41$  |
|                           | h2 | 3 | $2.96 \times 10^7$ | $-1.28 \pm 0.47$ | $6.15 \pm 0.12$                  | $2.28 \pm 0.31$  |
|                           | h3 | 3 | $3.06 \times 10^7$ | $-1.85 \pm 0.47$ | $6.68 \pm 0.14$                  | $1.73 \pm 0.30$  |
| CAI 155                   | h1 | 3 | $2.35 \times 10^7$ | $2.84 \pm 0.46$  | $10.41 \pm 0.19$                 | $2.62 \pm 0.28$  |
|                           | h2 |   |                    |                  |                                  |                  |
| (overlapping<br>spinel)   |    | 1 | $1.83 \times 10^7$ | $3.56 \pm 0.46$  | $4.07 \pm 0.06$                  | $2.04 \pm 0.25$  |
|                           | h3 | 1 | $6.89 \times 10^6$ | $2.10 \pm 0.54$  | $9.37 \pm 0.25$                  | $4.05 \pm 0.61$  |
| CAI 164                   | h1 | 5 | $1.19 \times 10^8$ | $-3.49 \pm 0.36$ | $4.54 \pm 0.03$                  | $1.49 \pm 0.13$  |
| (overlapping<br>spinel)   | h2 | 5 | $4.95 \times 10^7$ | $-3.58 \pm 0.35$ | $12.04 \pm 0.26$                 | $4.10 \pm 0.19$  |
|                           | h3 | 5 | $4.93 \times 10^7$ | $-1.34 \pm 0.35$ | $11.04 \pm 0.15$                 | $3.56 \pm 0.21$  |
| CAI 165                   | s1 | 8 | $2.29 \times 10^8$ | $-0.08 \pm 0.20$ | $2.54 \pm 0.01$                  | $0.78 \pm 0.10$  |
|                           | f1 | 8 | $4.44 \times 10^8$ | $-0.10 \pm 0.15$ | $(8.65 \pm 0.73) \times 10^{-4}$ | $0.01 \pm 0.06$  |

|                           |   |                    |                  |                  |                  |
|---------------------------|---|--------------------|------------------|------------------|------------------|
| d1                        | 8 | $3.47 \times 10^8$ | $1.25 \pm 0.26$  | $0.17 \pm 0.01$  | $0.02 \pm 0.25$  |
| CAI 176                   |   |                    |                  |                  |                  |
| h1                        | 8 | $2.18 \times 10^7$ | $-9.31 \pm 0.40$ | $4.20 \pm 0.13$  | $-0.41 \pm 0.48$ |
| h2                        | 8 | $2.79 \times 10^7$ | $-9.30 \pm 0.39$ | $29.13 \pm 0.30$ | $-0.71 \pm 0.39$ |
| h3                        | 8 | $2.14 \times 10^7$ | $-8.12 \pm 0.43$ | $8.52 \pm 0.21$  | $-0.49 \pm 0.45$ |
| CAI 181                   |   |                    |                  |                  |                  |
| h1                        | 8 | $8.65 \times 10^6$ | $-8.90 \pm 0.55$ | $48.92 \pm 0.61$ | $1.27 \pm 1.00$  |
| h2                        | 8 | $1.10 \times 10^7$ | $-8.05 \pm 0.48$ | $33.28 \pm 0.46$ | $-2.75 \pm 0.93$ |
| h3                        | 8 | $2.15 \times 10^7$ | $-8.29 \pm 0.39$ | $23.31 \pm 0.25$ | $-0.57 \pm 0.48$ |
| CAI 212                   |   |                    |                  |                  |                  |
| s1                        | 8 | $2.48 \times 10^8$ | $-0.33 \pm 0.20$ | $2.56 \pm 0.02$  | $0.71 \pm 0.08$  |
| d1                        | 8 | $7.71 \times 10^7$ | $-0.05 \pm 0.28$ | $1.09 \pm 0.01$  | $0.29 \pm 0.18$  |
| d2                        | 8 | $1.66 \times 10^8$ | $3.21 \pm 0.27$  | $0.43 \pm 0.03$  | $0.02 \pm 0.11$  |
| s2                        |   |                    |                  |                  |                  |
| (overlapping<br>diopside) | 8 | $1.95 \times 10^8$ | $0.94 \pm 0.20$  | $2.12 \pm 0.02$  | $0.61 \pm 0.10$  |
| CAI 222                   |   |                    |                  |                  |                  |
| h1                        | 3 | $2.08 \times 10^7$ | $-2.15 \pm 0.52$ | $16.05 \pm 0.73$ | $3.12 \pm 0.36$  |
| h2                        | 3 | $3.17 \times 10^7$ | $-5.19 \pm 0.48$ | $12.71 \pm 0.75$ | $2.44 \pm 0.27$  |
| h3                        |   |                    |                  |                  |                  |
| (overlapping<br>spinel)   | 1 | $2.05 \times 10^7$ | $-2.82 \pm 0.46$ | $3.42 \pm 0.05$  | $0.86 \pm 0.24$  |
| CAI 229                   |   |                    |                  |                  |                  |
| s1                        | 8 | $2.02 \times 10^8$ | $1.13 \pm 0.20$  | $2.41 \pm 0.01$  | $0.75 \pm 0.09$  |
| d1                        | 8 | $1.49 \times 10^8$ | $0.43 \pm 0.27$  | $0.60 \pm 0.02$  | $0.09 \pm 0.10$  |
| s2                        | 8 | $2.14 \times 10^8$ | $1.27 \pm 0.20$  | $2.37 \pm 0.01$  | $0.84 \pm 0.09$  |
| s3                        | 8 | $1.98 \times 10^8$ | $1.49 \pm 0.21$  | $2.21 \pm 0.01$  | $0.76 \pm 0.12$  |
| CAI 230                   |   |                    |                  |                  |                  |
| h1                        | 5 | $9.60 \times 10^6$ | $0.56 \pm 0.52$  | $43.29 \pm 0.61$ | $14.55 \pm 0.51$ |
| h2                        | 3 | $3.80 \times 10^7$ | $-3.94 \pm 0.45$ | $5.57 \pm 0.13$  | $2.25 \pm 0.28$  |
| h3                        | 5 | $1.52 \times 10^7$ | $0.27 \pm 0.51$  | $28.20 \pm 0.55$ | $8.92 \pm 0.37$  |
| h4                        | 5 | $3.99 \times 10^7$ | $-4.08 \pm 0.46$ | $11.95 \pm 1.33$ | $3.77 \pm 0.38$  |
| h5                        | 5 | $1.21 \times 10^7$ | $0.34 \pm 0.48$  | $28.74 \pm 0.54$ | $9.93 \pm 0.49$  |
| CAI 230SW                 |   |                    |                  |                  |                  |
| h1                        | 3 | $1.09 \times 10^7$ | $-0.30 \pm 0.51$ | $21.48 \pm 0.31$ | $6.40 \pm 0.49$  |
| h2                        | 3 | $2.29 \times 10^7$ | $-2.74 \pm 0.46$ | $11.26 \pm 0.49$ | $4.11 \pm 0.34$  |
| h3                        | 5 | $1.78 \times 10^7$ | $0.17 \pm 0.49$  | $12.35 \pm 0.20$ | $4.56 \pm 0.35$  |

---

**Table S2. Relative sensitivity factors determined on standards with known  $^{27}\text{Al}/^{24}\text{Mg}$  in three analysis sessions. Errors are 2 standard deviations.**

| Standard            | Session 1 | Session 2 | Session 3 |
|---------------------|-----------|-----------|-----------|
| P0 glass            | 1.17±0.04 | 1.21±0.04 | 1.19±0.04 |
| Burma spinel        | 1.29±0.01 | 1.37±0.02 | 1.31±0.02 |
| Madagascar hibonite | 1.30±0.15 | 1.36±0.11 | 1.34±0.20 |
